# Supplementary material for: Cognition and Challenges in Transition Readiness for Chinese Children with Inflammatory Bowel Disease: A Stakeholder-Based Qualitative Study
Source: Research Square preprint supplement (doi:10.21203/rs.3.rs-6980703/v1), 2025-08-08
Supplement: Supplementary file 1 [file 0ac1226a0d155bc4e499aef9.docx]

**Interview Guides for Parents**

① Have you heard of the concept of transition readiness? What is your understanding of it?

②Has your child been assessed for transition readiness?

③ Have you started working on transition readiness? If so, can you tell us more about it?

④What factors do you see as barriers to transition?

⑤ What conditions do you think would help facilitate a smooth transition?

⑥Do you have any other views on transition readiness?
