# Supplementary material for: Cognition and Challenges in Transition Readiness for Chinese Children with Inflammatory Bowel Disease: A Stakeholder-Based Qualitative Study
Source: Research Square preprint supplement (doi:10.21203/rs.3.rs-6980703/v1), 2025-08-08
Supplement: Supplementary file 2 [file 0df934d262f53e7cb3d2a3a0.docx]

**Interview Guides for Professionals**

① Have you heard of the concept of transition readiness? What is your understanding of it?

② Have you evaluated transition readiness for children with IBD and what tools were used?

③ Has transition care been implemented clinically for children with IBD?

④What factors do you think prevent children with IBD from transitioning?

⑤ What conditions do you think can help facilitate a smooth transition process?

⑥ Do you have any other thoughts about transition preparation?
