# Supplementary material for: Cognition and Challenges in Transition Readiness for Chinese Children with Inflammatory Bowel Disease: A Stakeholder-Based Qualitative Study
Source: Research Square preprint supplement (doi:10.21203/rs.3.rs-6980703/v1), 2025-08-08
Supplement: Supplementary file 3 [file c22c62e7fc496bb9718b7ad6.docx]

**Interview Guides for Children**

① Have you heard of the concept of transition readiness? Can you tell us about your understanding?

② Have you been assessed for your level of transition readiness?

③ Have you started transition readiness work? If so can you elaborate?

④ What factors do you think may hinder transition?

⑤ What conditions do you think could help facilitate a smooth transition process?

⑥ Do you have any other views on transition readiness?
